# Supplementary material for: Absolute binding free energies for octa-acids and guests in SAMPL5
Source: Springer Nature journal article supplement (doi:10.1007/s10822-016-9965-5), 2016-09-30

## 1 Supporting information

### 1.1 Setting up the systems and MD simulations

We employed QM calculations to aid the parametrization of neutral G3 and G5 guests. QM calculations were performed using Gaussian 09 [66] along with the M06-2X density functional[67, 68], the SMD implicit solvent model[69] and the G-31+G(d) basis set.[70] The resulting parameters are shown in Figure 1.

**Fig. 1** Results from the QM calculation indicate that the distance between the hydrogen atoms from the hydroxide ion and the nitrogen atom in the tetramethylammonium group should be  $d = 2.962 \text{ \AA}$ , and that the O-N-C angle (between the oxygen atom in the hydroxide ion, N atom in the tetramethylammonium group and the connecting C atom to the rest of the structure) should be  $\phi = 180^\circ$ .

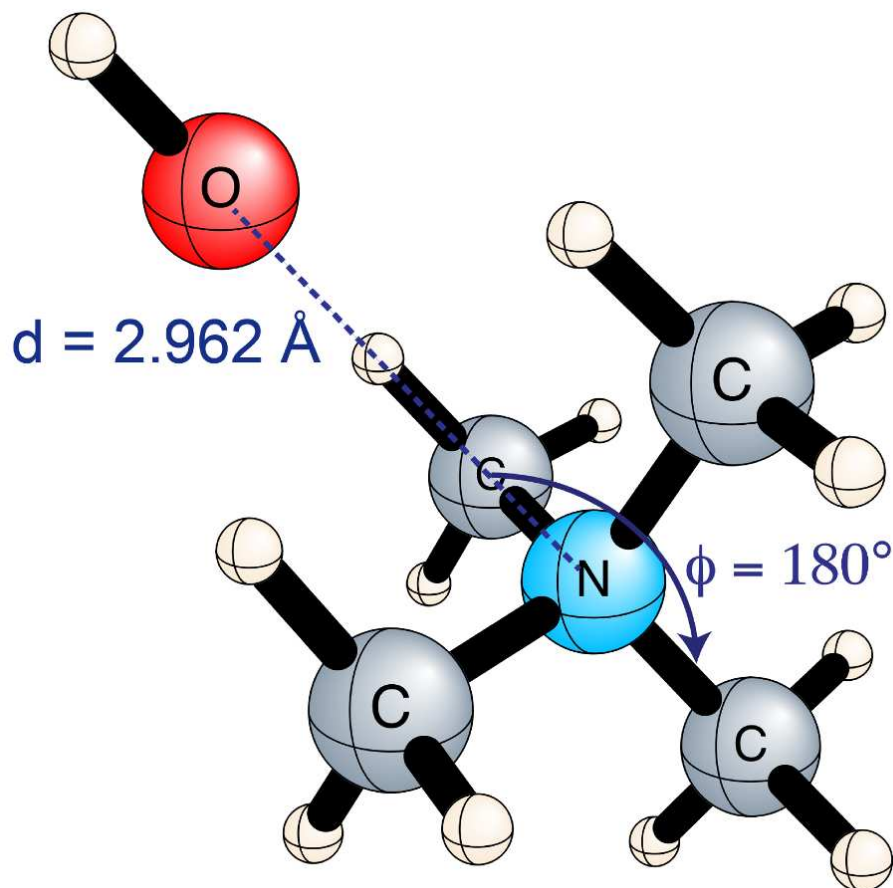

**Table 1** The total number of atoms, and the number of Na ions and Cl ions used in each system, respectively. Systems containing G1 to G5, and G6 used 25 mM NaCl and 165 mM NaCl, corresponding to the ionic strength at pH 11.5 of 10 mM and 50 mM  $\text{Na}_3\text{PO}_4$ , respectively.

|    | OAH   |     |       |       |         |      | OAMe  |     |       |       |         |     |
|----|-------|-----|-------|-------|---------|------|-------|-----|-------|-------|---------|-----|
|    | 1     |     | 2     |       | neutral |      | 1     |     | 2     |       | neutral |     |
| G1 | 11878 | 9/- | 11894 | 11/2  | 11884   | 8/-  | 11899 | 9/- | 11895 | 11/2  | 11902   | 8/- |
| G2 | 11884 | 9/- | 11891 | 11/2  | 11884   | 8/-  | 11890 | 9/- | 11882 | 11/2  | 11911   | 8/- |
| G3 | 11920 | 7/- | 11882 | 9/2   | 11887   | 8/-  | 11908 | 7/- | 11900 | 9/2   | 11893   | 8/- |
| G4 | 11900 | 9/- | 11886 | 11/2  | 11897   | 8/-  | 11906 | 9/- | 11898 | 11/2  | 11918   | 8/- |
| G5 | 11903 | 7/- | 11898 | 9/2   | 11897   | 8/-  | 11894 | 7/- | 11886 | 9/2   | 11903   | 8/- |
| G6 | 11873 | 9/- | 11828 | 21/12 | 11875   | 12/4 | 11906 | 9/- | 11898 | 21/12 | 11894   | 8/- |

**Table 2** Molecular dynamics simulations. All simulation lengths are in ns. ‘1’ and ‘2’ stand for neutralized systems and for systems with ionic concentrations corresponding to experimental ionic strength, respectively; “neutral” stands for systems with neutral guests.

|    | OAH   |       |         | OAMe |      |         |
|----|-------|-------|---------|------|------|---------|
|    | 1     | 2     | neutral | 1    | 2    | neutral |
| G1 | 1000  | 1000  | 700     | 1000 | 400  | 400     |
| G2 | 1000  | 1000  | 800     | 900  | 500  | 500     |
| G3 | 2000  | 2500  | 2000    | 2000 | 2000 | 2000    |
| G4 | 2500  | 2500  | 2000    | 2000 | 2000 | 2000    |
| G5 | 2000  | 1700  | 1500    | 1900 | 1500 | 1500    |
| G6 | 2000  | 1500  | 1000    | 1400 | 1500 | 1200    |
|    | 10500 | 10200 | 8000    | 9200 | 7900 | 7600    |

## 1.2 GalaxyDock-HG

We randomly generated 50 initial binding poses, which were then optimized using CSA with the AutoDock4 scoring function. The latter comprises the van der Waals energy, directional hydrogen bond energy, Coulomb electrostatic energy, and desolvation free energy as follows:

$$\begin{aligned}
 E_{AutoDock} = & w_{vdW} \sum_{i,j} \left( \frac{A_{ij}}{r_{ij}^{12}} - \frac{B_{ij}}{r_{ij}^6} \right) + w_{hbond} \sum_{i,j} h(t_{ij}) \left( \frac{C_{ij}}{r_{ij}^{12}} - \frac{D_{ij}}{r_{ij}^{10}} \right) \\
 & + w_{qq} \sum_{i,j} \frac{q_i q_j}{\varepsilon(r_{ij}) r_{ij}} + w_{desolv} \sum_{i,j} (S_i V_j + S_j V_i) \exp\left(-\frac{r_{ij}}{2\sigma^2}\right),
 \end{aligned} \tag{1}$$

where:

- $A_{ij}, B_{ij}$  and  $C_{ij}, D_{ij}$  are parameters for the van der Waals energy and for the hydrogen bond energy, respectively
- $h(t_{ij})$  is the weight factor to describe hydrogen bond directionality,
- $q_i, q_j$  are partial charges,
- $\varepsilon(r_{ij})$  is a distance-dependent dielectric constant,
- $S, V, \sigma$  are desolvation energy parameters.

Partial charges were taken from the CGENFF-generated parameters. Figure 2 describes the GalaxyDock-HG protocol for choosing binding poses.

**Fig. 2** Protocol for GalaxyDock-HG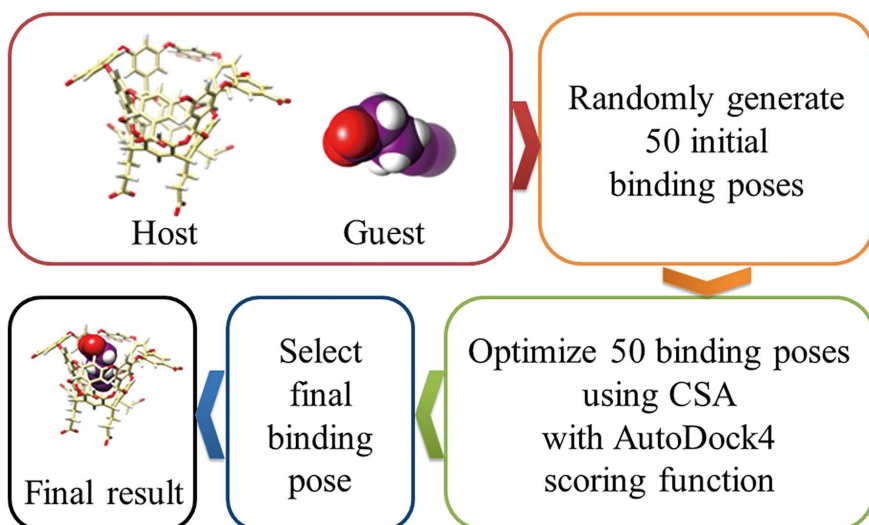**Table 3** Energy values for host-guest systems containing charged guests, provided by GalaxyDock-HG and the averaged experimental values. All values are in kcal/mol.

| Guest | OAH Energy | OAH $\Delta G_{\text{bind}}^{\text{exp}}$ | OAMe Energy | OAMe $\Delta G_{\text{bind}}^{\text{exp}}$ |
|-------|------------|-------------------------------------------|-------------|--------------------------------------------|
| G1    | -2.39      | -5.22                                     | -2.31       | -5.36                                      |
| G2    | -3.59      | -4.49                                     | -3.49       | -5.15                                      |
| G3    | -1.47      | -4.78                                     | -1.61       | -5.85                                      |
| G4    | -5.95      | -9.38                                     | -3.87       | -2.38                                      |
| G5    | -2.43      | -4.12                                     | -2.26       | -3.91                                      |
| G6    | -3.88      | -5.12                                     | -3.45       | -4.48                                      |

### 1.3 Free energy calculations

The free energy spent to turn the restraints off between the guest and the host was computed analytically with the following formula:

$$\Delta G_{\text{restr off}}^{\text{complex}} = -kT \ln \left[ \frac{8\pi^2 V (K_r K_{\theta_A} K_{\theta_B} K_{\phi_A} K_{\phi_B} K_{\phi_C})^{1/2}}{r^2 \sin \theta_A \sin \theta_B (2\pi kT)^3} \right], \quad (2)$$

where:

- $k$  = Boltzmann constant,
- $T$  = simulation temperature,
- $V$  = volume of the simulation box,
- $K_r$  = force constant of distance restraint,
- $K_{\theta_A}, K_{\theta_B}$  = force constants of angle restraints,
- $K_{\phi_A}, K_{\phi_B}, K_{\phi_C}$  = force constants of dihedral restraints,
- $r$  = distance between selected atom in guest and selected atom in protein,
- $\theta_A, \theta_B$  = selected angles.

**Table 4** TI simulations:  $\lambda$  points for each free energy component: restraints ( $\Delta G_{\text{restr on}}^{\text{complex}}$ ), electrostatics ( $\Delta G_{\text{charge}}$ ) and van der Waals interactions ( $\Delta G_{\text{vdW}}$ )

| restraints | charge | vdW   |
|------------|--------|-------|
| 0.0005     | 0.0    | 0.0   |
| 0.0020     | 0.1    | 0.1   |
| 0.0020     | 0.2    | 0.2   |
| 0.0040     | 0.3    | 0.3   |
| 0.00625    | 0.4    | 0.4   |
| 0.0100     | 0.5    | 0.5   |
| 0.01875    | 0.6    | 0.6   |
| 0.03       | 0.675  | 0.675 |
| 0.05       | 0.725  | 0.725 |
| 0.075      | 0.775  | 0.775 |
| 0.10       | 0.825  | 0.825 |
| 0.20       | 0.875  | 0.875 |
| 0.30       | 0.925  | 0.925 |
| 0.40       | 0.95   | 0.95  |
| 0.50       | 0.975  | 0.975 |
| 0.60       | 1.0    | 1.0   |
| 0.70       | -      | -     |
| 0.70       | -      | -     |
| 0.80       | -      | -     |
| 0.90       | -      | -     |
| 1.00       | -      | -     |

**Table 5** HREM-BAR simulations:  $\lambda$  points for the electrostatics ( $\Delta G_{\text{charge}}$ ) and van der Waals ( $\Delta G_{\text{vdW}}$ ) free energy component

| charge | vdW   |
|--------|-------|
| 1.0    | 1.00  |
| 0.916  | 0.995 |
| 0.833  | 0.985 |
| 0.75   | 0.960 |
| 0.666  | 0.930 |
| 0.583  | 0.900 |
| 0.5    | 0.850 |
| 0.416  | 0.800 |
| 0.333  | 0.750 |
| 0.25   | 0.700 |
| 0.166  | 0.650 |
| 0.083  | 0.600 |
| -      | 0.550 |
| -      | 0.500 |
| -      | 0.450 |
| -      | 0.390 |
| -      | 0.330 |
| -      | 0.270 |
| -      | 0.220 |
| -      | 0.180 |
| -      | 0.00  |

#### 1.4 QM Calculations

To properly understand the effect of  $\text{pH} = 11.5$  upon the electrostatics of the guest molecules, we performed QM calculations to understand the anionic guests' proton affinity, and the cationic guests' affinity for hydroxide. For the anionic guests,

**Table 6** Results from TI free energy calculations for each system, in kcal/mol.

|    | OAH                     |                           |                         | OAMe                    |                         |                         |
|----|-------------------------|---------------------------|-------------------------|-------------------------|-------------------------|-------------------------|
|    | 1                       | 2                         | neutral                 | 1                       | 2                       | neutral                 |
| G1 | -0.9±1.3 <sup>*,m</sup> | -4.5±0.6 <sup>*,m,d</sup> | -7.6±0.7 <sup>*,m</sup> | -3.1±0.9 <sup>d</sup>   | -4.2±0.8 <sup>*,d</sup> | -6.1±0.9 <sup>*,m</sup> |
| G2 | 2.1±1.8 <sup>*,m</sup>  | -2.7±0.7 <sup>*,d</sup>   | 4.7±0.7 <sup>m</sup>    | -6.4±1.4 <sup>m</sup>   | -7.1±0.6 <sup>*,m</sup> | 5.8±0.7 <sup>*,m</sup>  |
| G3 | -4.8±1.1 <sup>*,m</sup> | -0.1±0.2 <sup>*,d</sup>   | -4.5±1.2 <sup>*,m</sup> | -1.1±1.6 <sup>d</sup>   | -2.6±0.7 <sup>*,m</sup> | -6.5±1.5 <sup>*,m</sup> |
| G4 | -7.8±1.3 <sup>*,d</sup> | -5.1±0.7 <sup>*,d</sup>   | -8.1±1.5 <sup>*,m</sup> | -9.9±2.4 <sup>*,m</sup> | -9.3±2.0 <sup>m</sup>   | -1.9±1.2 <sup>*,m</sup> |
| G5 | -1.7±0.1 <sup>*,d</sup> | -1.6±0.9 <sup>*,d</sup>   | -1.6±0.5 <sup>*,m</sup> | -2.2±1.0 <sup>d</sup>   | -2.6±0.9 <sup>*,m</sup> | -2.6±0.6 <sup>*,m</sup> |
| G6 | -4.9±1.5 <sup>*,m</sup> | -4.4±1.6 <sup>d</sup>     | 5.9±1.4 <sup>*,m</sup>  | -5.9±0.7 <sup>*,d</sup> | -7.0±0.3 <sup>*,m</sup> | 9.3±2.5 <sup>*,m</sup>  |

<sup>\*</sup> The structure on which we performed FES resulted from MD simulations with NOE restraints.

<sup>d</sup> The ligand was placed in the host through GalaxyDock-HG.

<sup>m</sup> The ligand was placed in the host manually.

**Table 7** Results from HREM-BAR free energy calculations for each system, in kcal/mol.

|    | OAH                     |                         |                         | OAMe                     |                          |                         |
|----|-------------------------|-------------------------|-------------------------|--------------------------|--------------------------|-------------------------|
|    | 1                       | 2                       | neutral                 | 1                        | 2                        | neutral                 |
| G1 | -4.2±1.0 <sup>*,m</sup> | -4.5±0.2 <sup>m</sup>   | -6.4±0.7 <sup>m</sup>   | -4.2±0.4 <sup>d</sup>    | -4.2±0.0 <sup>*,m</sup>  | -                       |
| G2 | -2.2±0.2 <sup>*,m</sup> | -3.2±0.2 <sup>d</sup>   | -6.2±0.3 <sup>*,m</sup> | -5.3±0.3 <sup>d</sup>    | -4.7±0.3 <sup>*,m</sup>  | -                       |
| G3 | -2.9±0.7 <sup>*,m</sup> | -2.2±0.4 <sup>*,d</sup> | -3.4±0.0 <sup>*,m</sup> | -4.0±0.5 <sup>*,d</sup>  | -3.21±0.4 <sup>*,m</sup> | -7.6±0.5 <sup>*,m</sup> |
| G4 | -5.0±0.1 <sup>d</sup>   | -4.4±0.5 <sup>d</sup>   | -8.0±1.8 <sup>*,m</sup> | -10.5±1.0 <sup>*,m</sup> | -6.6±0.3 <sup>*,m</sup>  | -                       |
| G5 | 0.2±0.2 <sup>d</sup>    | -0.7±0.1 <sup>*,d</sup> | -2.7±0.9 <sup>*,m</sup> | -1.6±0.7 <sup>d</sup>    | -2.9±0.7 <sup>*,m</sup>  | -3.0±0.4 <sup>*,m</sup> |
| G6 | -3.9±0.2 <sup>*,m</sup> | -4.1±0.1 <sup>d</sup>   | -4.2±0.0 <sup>*,m</sup> | -4.7±0.2 <sup>*,d</sup>  | -4.5±0.5 <sup>*,m</sup>  | -                       |

<sup>\*</sup> The structure on which we performed FES resulted from MD simulations with NOE restraints. Italicized values were computed after the end of the competition and therefore were not part of the submitted sets.

<sup>d</sup> The ligand was placed in the host through GalaxyDock-HG.

<sup>m</sup> The ligand was placed in the host manually.

**Table 8** Results<sup>\*</sup> from TI simulations for OAH-G1 when increasing equilibration and production times from 20 ps and 200 ps per  $\lambda$  point to 50 ps and 500 ps per  $\lambda$  point, and the average experimental binding energy. All values are in kcal/mol.

|              | 1        | 2        | $\Delta G_{\text{bind}}^{\text{exp}}$ |
|--------------|----------|----------|---------------------------------------|
| 20 ps/200 ps | -0.9±1.3 | -4.5±0.6 | -5.22                                 |
| 50 ps/500 ps | -2.7±0.2 | -5.3±1.0 | -5.22                                 |

<sup>\*</sup> The standard deviations were obtained by repeating each simulation three times.

**Table 9** Results (in kcal/mol) from TI and HREM-BAR calculations for the OAH-G4 and OAMe-G4 complexes when G4 is reparametrized with a lonepair.

|          | OAH-G4   | OAMe-G4 |
|----------|----------|---------|
| TI       | -4.6±1.1 | 0.0±0.4 |
| HREM-BAR | -3.8±0.7 | 1.5±0.4 |

these are  $pK_a$  calculation, whereas for the cationic guests, these are the analog of  $pK_a$  calculations for hydroxide association. We will refer to them as “ $pK_a$  calculations” for the remainder of this discussion.

In this work we used a relative  $pK_a$  scheme.[71, 72] In the relative scheme (eq. 3) the free energy of binding a proton (or hydroxide) is computed for the guest molecule and an analogous ligand in the bulk aqueous phase. The difference be-

tween these binding free energies is then added to the experimentally determined  $pK_a$  (Table 11, column 4) value, to arrive at the calculated  $pK_a$  value (Table 10, column 3). Finally, this is readily converted into a free energy value by eq. 4 (see values in Table 10, column 5).

All QM calculations in this work were performed using Gaussian 09 [66] at the M06-2X/6-31+G(d) level of theory and the G-31+G(d) basis set.[70]. We utilized a “vertical” solvation scheme, where aqueous phase free energies were approximated by first performing a geometry optimization in the gas phase, and then performing a single-point energy calculation on this geometry in the bulk aqueous phase. All QM optimizations performed with “Tight” wavefunction and geometry convergence criteria. The calculations utilized the “UltraFine” numerical quadrature as required by the M06-2X functional.

$$pK_a^{\text{rel}}(\text{AH}^+) = pK_a^{\text{exp}}(\text{LH}^+) + \left[ \Delta G_{\text{aq}}^*(\text{AH}^+) - \Delta G_{\text{aq}}^*(\text{LH}^+) \right] / [\ln(10)RT] \quad (3)$$

$$\Delta G_{\text{aq}} = pK_a RT \ln(10) \quad (4)$$

**Table 10** Computed  $pK_a$  values for Octa-Acid Guests in bulk aqueous phase using M06-2X density functional and SMD implicit solvent. Population of charged species or neutral species and the corresponding free energy of changing the protonation state in solution are calculated at  $\text{pH} = 11.5$  and at  $25^\circ\text{C}$ . In some cases experimental  $pK_a$  data was available for the guest molecule, here we present the experimental  $pK_a$  value. Free energy values are from 100% neutral reference population to the equilibrium population, and are in kcal/mol. ‘-’ denotes charged species.

| Guest        | Analog      | $pK_a / pK_b$ | Pop. (%)   | $\Delta G_{\text{corr}}$ (kcal/mol) |
|--------------|-------------|---------------|------------|-------------------------------------|
| <b>OA-G1</b> | <b>L1</b>   | 5.20          | 100.00 (-) | -8.5                                |
| <b>OA-G2</b> | expt.       | 3.55          | 100.00 (-) | -10.8                               |
| <b>OA-G3</b> | <b>TMAO</b> | 5.53          | 100.00 (o) | 3.4                                 |
| <b>OA-G4</b> | <b>L2</b>   | 4.84          | 100.00 (-) | -9.0                                |
| <b>OA-G5</b> | <b>TMAO</b> | 5.48          | 100.00 (o) | 3.3                                 |
| <b>OA-G6</b> | expt.       | 3.46          | 100.00 (-) | -10.9                               |

**Table 11** Systematic names and experimental  $pK_a$  or  $pK_b$  values for octa-acid guests and/or analogs. All  $pK_a$  and  $pK_b$  measurements were taken at  $25^\circ\text{C}$ .

| Molecule     | Analog    | Systematic Name                | $pK_a / pK_b$ | Ref. |
|--------------|-----------|--------------------------------|---------------|------|
| <b>L1</b>    | <b>G1</b> | butanoic acid                  | 4.83          | 73   |
| <b>OA-G2</b> | -         | 4-cyanobenzoic acid            | 3.55          | 73   |
| <b>TMAO</b>  | <b>G3</b> | tetramethyl ammonium hydroxide | 4.2           | 74   |
| <b>L2</b>    | <b>G4</b> | adamantane-1-carboxylic acid   | 5.1           | 75   |
| <b>TMAO</b>  | <b>G5</b> | tetramethyl ammonium hydroxide | 4.2           | 74   |
| <b>OA-G6</b> | -         | 3-nitrobenzoic acid            | 3.46          | 73   |

**Fig. 3** Chemical structure of the analog molecules used to compute  $pK_a$  values for the octa-acid guests. **L1** (left) and **L2** (right).

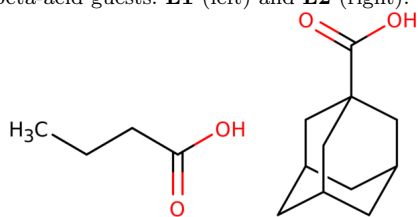

**Fig. 4** Top row:  $\Delta G_{\text{bind}}^{\text{exp}} - \Delta G_{\text{bind}}^{\text{comp}}$  for each OAH-guest complex. Bottom row: Difference between ITC and NMR values experimental and all submitted computed values for OAME and each guest.

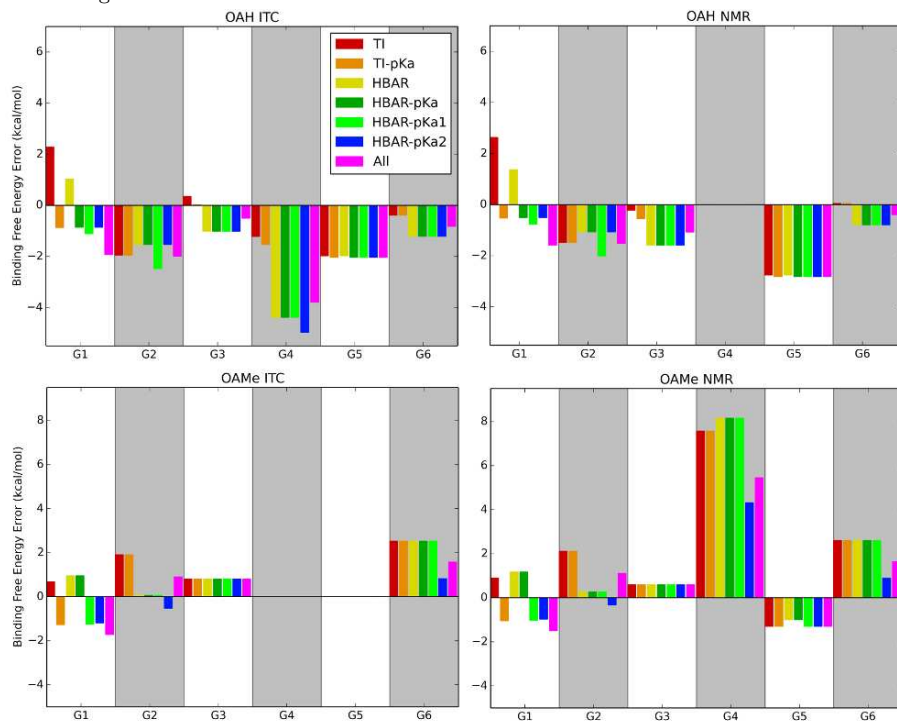

### 1.5 Analyzing the results from free energy calculations

#### 1.6 Guest ranking

Guest ranking by binding free energy was not consistent among experimental (ITC, NMR) nor computational methods (TI, HREM-BAR, GalaxyDock-HG). But, as Table 12 shows, there was somewhat consensus as to what the strongest and weakest binders are. All computational methods indicated G4 as the strongest binder to both OAH and OAME. ITC also indicated G4 as the strongest binder

**Table 12** Ranking the guests by binding free energy by experimental methods, by the lowest-RMSD computational method and GalaxyDock-HG (GD-HG).

|      |          | Strongest | —    | —    | —    | —>   | Weakest |
|------|----------|-----------|------|------|------|------|---------|
| OAH  | ITC      | G4 >      | G1 > | G6 > | G2 > | G3 > | G5      |
| OAH  | NMR      | G3 >      | G1 > | G6 > | G5 > | G2 > | —       |
| OAH  | TI       | G4 >      | G6 > | G1 > | G3 > | G2 > | G5      |
| OAH  | GD-HG    | G4 >      | G6 > | G2 > | G5 > | G1 > | G3      |
| OAMe | ITC      | G3 >      | G1 > | G2 > | G6   | —    | —       |
| OAMe | NMR      | G3 >      | G1 > | G2 > | G6 > | G5 > | G4      |
| OAMe | HBAR-ps2 | G4 >      | G3 > | G6 > | G2 > | G1 > | G5      |
| OAMe | GD-HG    | G4 >      | G2 > | G6 > | G5 > | G1 > | G3      |

to OAH. But for OAMe, G4 was ranked the weakest binder by NMR (no value available from ITC), and both experimental methods ranked G3 as the strongest binder. TI and HREM-BAR (and ITC for OAH) pointed towards G5 and G3 as the weakest binders. GalaxyDock-HG also ranked G3 as the weakest binder. This was probably due to the parametrization of neutral G3 and G5. GalaxyDock-HG had almost the same ranking for both OAH and OAMe systems. The only large fluctuation was between the reported energy for OAH-G4 and OAMe-G4, which increased by 2.08 kcal/mol, from -5.95 kcal/mol for OAH to -3.87 kcal/mol for OAMe (see Table 3). This indicates that even if the method is sensitive to the difference between the hosts, the offset was not enough to change guest ranking. The difference between OAH and OAMe for all other guests was between 0.08 kcal/mol and 0.43 kcal/mol.



**Fig. 5** Top: ITC experimental data for OAH and OAME systems versus computed  $\Delta G_{\text{bind}}^{\text{TI-ps}}$ . The TI-ps had the lowest RMSD values for OAH systems for the ITC full OAH experimental set. Bottom: NMR experimental data for OAH and OAME systems versus computed  $\Delta G_{\text{bind}}^{\text{HBAR-ps2}}$ . The HBAR-ps2 had the lowest RMSD values for OAME systems for the NMR full OAME experimental set. Values for OAH are represented by green symbols, and for OAME by blue symbols.

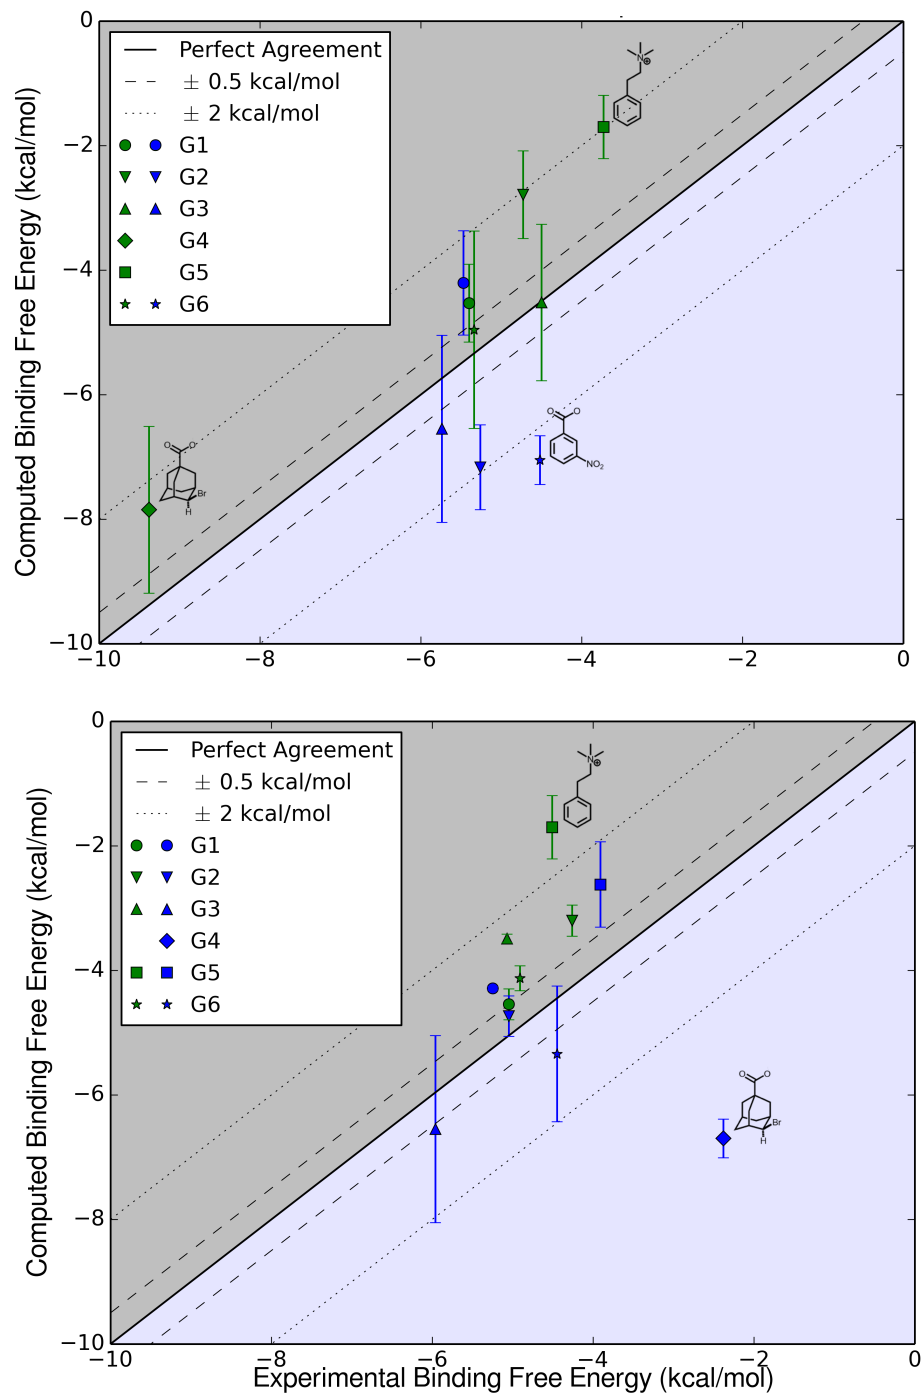

Supplement: MOESM1 [file 10822_2016_9965_MOESM1_ESM.pdf]
